# Supplementary material for: A Presenilin/Notch1 pathway regulated by miR-375, miR-30a, and miR-34a mediates glucotoxicity induced-pancreatic beta cell apoptosis
Source: PubMed Central journal article supplement (PMC5095347; doi:10.1038/srep36136), 2016-11-02
Supplement: srep36136-s1.pdf [file srep36136-s1.pdf]

## SUPPLEMENTARY INFORMATION

A Presenilin/Notch1 pathway regulated by *miR-375*, *mR-30a*, and *miR-34a* mediates

glucotoxicity induced-pancreatic beta cell apoptosis

Yating Li, Tao Zhang, Yuncai Zhou, Yi Sun, Yue Cao, Xiaoai Chang, Yunxia Zhu, and

Xiao Han

**Supplementary Table 1** Primers for wt and mt 3'utr plasmids cloning.

| NAME              | SEQUENCES (5'-3')              |                                |
|-------------------|--------------------------------|--------------------------------|
|                   | Forward                        | Reverse                        |
| wt- <i>Psen1</i>  | CTAGT TCCTGTGTCCTCAGCGAACAAA A | AGCTT TTTGTTCGCTGAGGACACAGGA A |
| mt- <i>Psen1</i>  | CTAGT TCCTGTGTCCTCAGCGTAGATA A | AGCTT TATCTACGCTGAGGACACAGGA A |
| wt- <i>Psen2</i>  | CTAGT ATAAAAAAGTGTTGTGTTTACT A | AGCTT AGTAAACACAACACTTTTTTAT A |
| mt- <i>Psen2</i>  | CTAGT ATAAAAAAGTGTTGTGATAAGT A | AGCTT ACTTATCACAACACTTTTTTAT A |
| wt- <i>Notch1</i> | CTAGT TTTTCCACAGAAACACTGCCT A  | AGCTT AGGCAGTGTTTCTGTGGAAA A   |
| mt- <i>Notch1</i> | CTAGT TTTTCCACAGAAACAGTCCGT A  | AGCTT ACGGACTGTTTCTGTGGAAAA A  |

**Supplementary Table 2** Primers for quantitative RT-PCR.

| NAME           | SEQUENCES (5'-3')                   |                                                  |
|----------------|-------------------------------------|--------------------------------------------------|
|                | Forward                             | Reverse                                          |
| <i>Notch1</i>  | GGTGCGAGCGCAGTGAAGGA                | CCCGCTGCTGCCCTCTTTCC                             |
| <i>Psen1</i>   | CAAGAGCTGCTGTCCAGGAA                | TGAAAATGGCGAGCAGGAGT                             |
| <i>Psen2</i>   | TGTACGATCTCGTGGCTGTG                | TCCATCTCTGGATCGTAAGGGA                           |
| <i>Ncstn</i>   | CTGGGCCACAGAGACGATG                 | CTCCACTGAGTTTCCCCAC                              |
| <i>Psenen</i>  | GAAGGGGTAAACCCCACTG                 | GTACTIONCCGGCACAGGTTCA                           |
| <i>Ins1</i>    | CATAGACCATCAGCAAGCAGG               | GAAGAAACCACGTTCCCCAC                             |
| <i>Ins2</i>    | TGTCAAACAGCACCTTTGTGG               | GTGCCAAGGTCTGAAGGTCAC                            |
| <i>Pdx1</i>    | GGTATAGCCAGCGAGATGCT                | TCAGGTGGGAGCCTGATTCT                             |
| <i>Mafa</i>    | AAGGAGGAGGTCATCCGACT                | TCTGGAGCTGGCACTTCTCG                             |
| <i>Neurod1</i> | ATGACCAAATCATACAGCGAGAG             | TCTGCCTCGTGTTCCCTCGT                             |
| <i>Actb</i>    | GCCATGTACGTAGCCATC                  | CTCTCAGCTGTGGTGGTG                               |
| <i>miR-375</i> | ACACTCCAGCTGGGTTTGTTCGTTCCGGC<br>TC | CTCAACTGGTGTCGTGGAGTCGGCAATTC<br>AGTTGAGTCACGCGA |
| <i>miR-34a</i> | ACACTCCAGCTGGGTGGCAGTGTCTTAG<br>CTG | CTCAACTGGTGTCGTGGAGTCGGCAATTC<br>AGTTGAGAACAACCA |
| <i>Urp</i>     |                                     | TGGTGTCGTGGAGTCG                                 |
| <i>u6</i>      | CTCGCTTCGGCAGCACA                   | AACGCTTCACGAATTTGCGT                             |

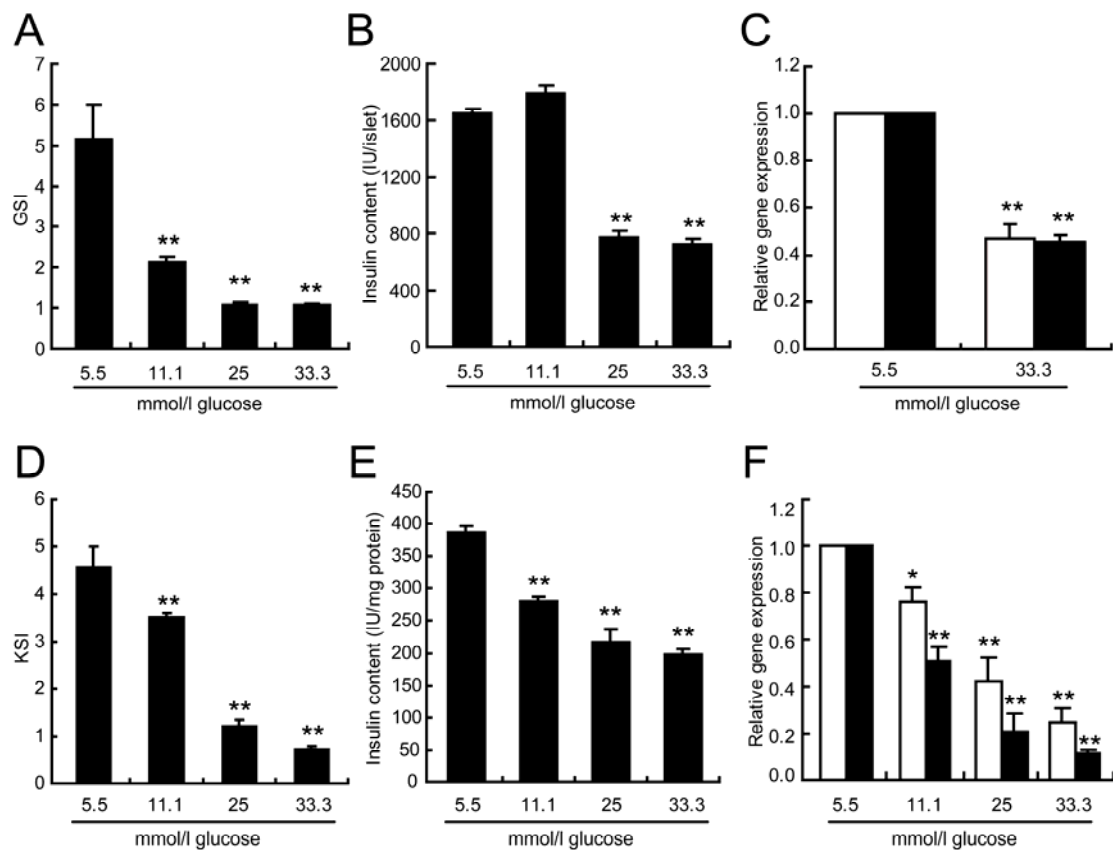

**Supplementary Figure. 1 Glucotoxicity caused beta-cell dysfunction.** (A-C) Rat islets were treated with low glucose (5.5 mmol/l glucose, control), or high glucose (11.1, 25, 33.3 mmol/l glucose) for 72 h by which time glucose-stimulated insulin secretion assay as shown by GSI (A), insulin content (B), as well as *Ins1* (white bars) and *Ins2* (black bars) genes level (C) analyzed by qRT-PCR were accessed. (D-F) INS-1 cells were treated with low glucose (5.5 mmol/l glucose, control, white bars), or high glucose (11.1, 25, 33.3 mmol/l glucose, black bars) for 24 h by which time potassium-stimulated insulin secretion assay as shown by KSI (A), insulin content (B), as well as *Ins1* (white bars) and *Ins2* (black bars) (C) analyzed by qRT-PCR were accessed. Data shown are means  $\pm$  SEM and representative of three separate experiments. \* $p < 0.05$  and \*\* $p < 0.01$  vs. control.

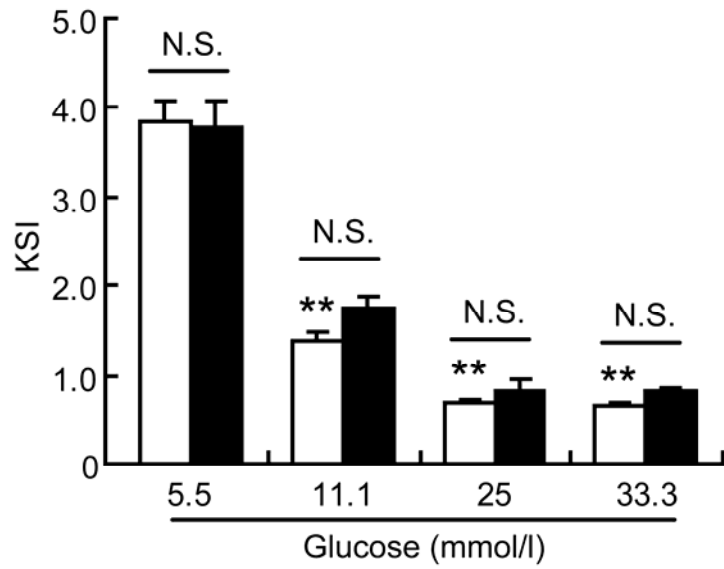

**Supplementary Figure 2. Overexpression of NICD1 could not recover glucotoxicity-induced insulin secretion defect.** After transient transfection with vector (control, white bar) or NICD (black bar) plasmid for 24 h, INS-1 cells were further treated with glucose for 24 h and KSI was performed. Data shown are means  $\pm$  SEM and representative of three separate experiments. \*\* $p < 0.01$  vs. control.

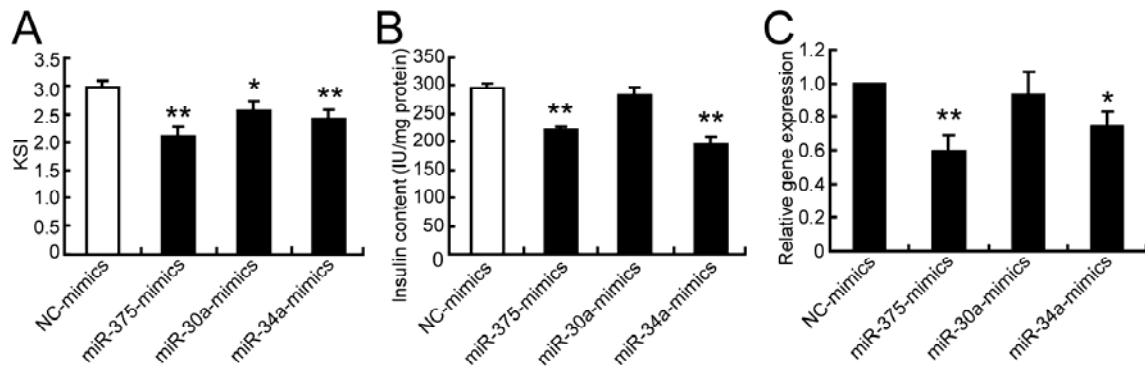

**Supplementary Figure 3. *miR-375*, *miR-30a* and *miR-34a* induced beta cell dysfunction in INS-1 cells.** INS-1 cells were transfected with *miR-375*, *miR-30a* and *miR-34a* for 24 h when KSI (A), insulin content (B) and *Ins2* gene level (C) were determined. Data shown are means ± SEM and representative of three separate experiments. \* $p < 0.05$  and \*\* $p < 0.01$  vs. control.

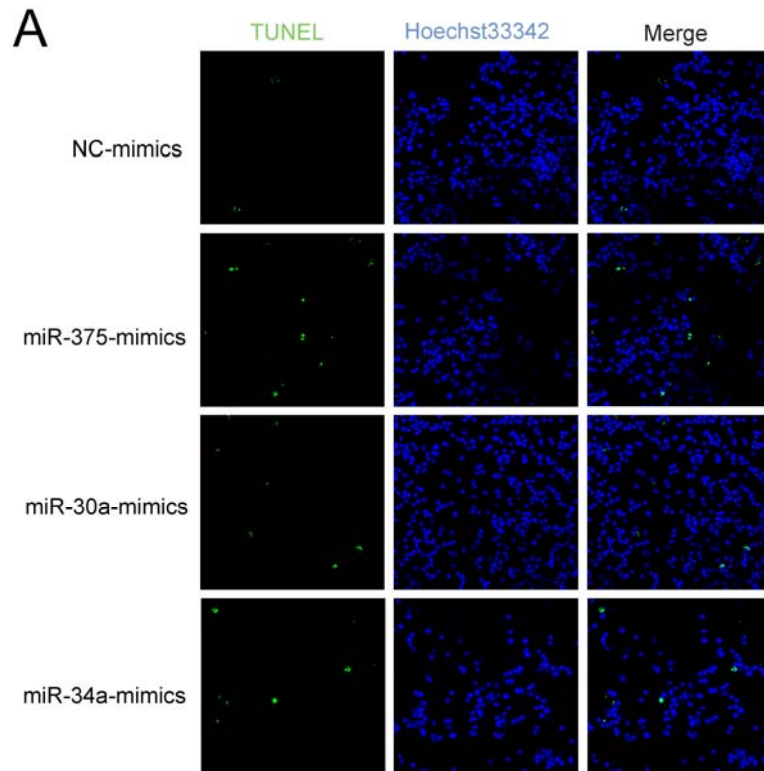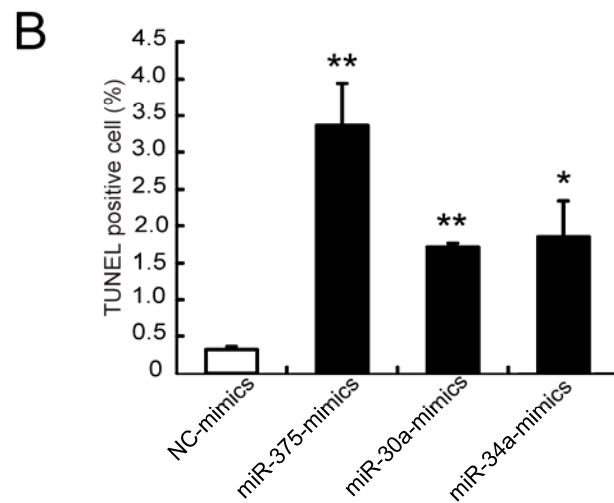

**Supplementary Figure 4. *miR-375*, *miR-30a* and *miR-34a* induced beta cell apoptosis in INS-1 cells.** INS-1 cells were transfected with *miR-375*, *miR-30a* and *miR-34a* for 48 h when TUNEL assay was performed (A), and quantitative result of TUNEL assay was analyzed (B). Data were obtained from 8 scans in each group \* $p < 0.05$  and \*\* $p < 0.01$  vs. control.

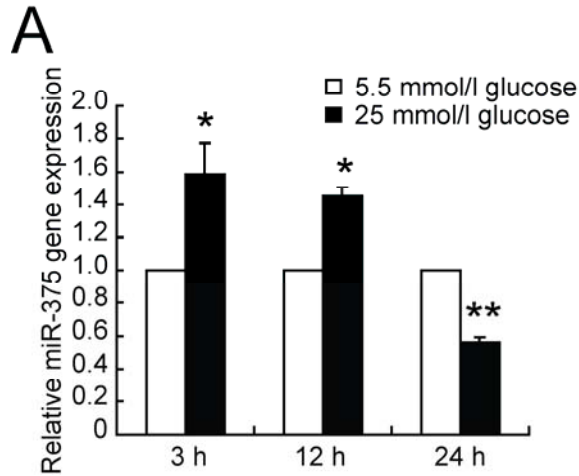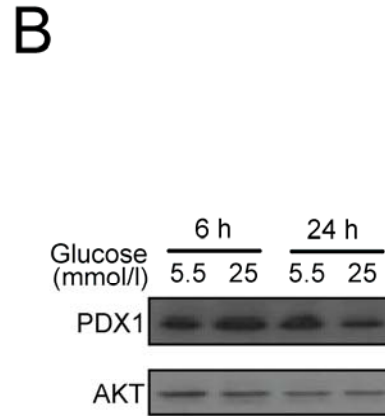

**Supplementary Figure. 5 The inverted regulation between PDX1 and miR-375 by glucotoxicity.** INS-1 cells were treated with 5.5 or 25 mmol/l glucose for indicated time when expression level of miR-375 was detected by qRT-PCR (A). INS-1 cell were exposure to 5.5 or 25 mmol/l glucose for indicated time when protein level of PDX1 was measured (B). AKT was used as an internal standard. Data shown are means  $\pm$  SEM and representative of three separate experiments. \* $p < 0.05$  and \*\* $p < 0.01$  vs. control.
